# Supplementary material for: Highly sensitive and selective “naked eye” sensing of Cu(ii) by a novel amido–imine based receptor: a spectrophotometric and DFT study with practical application
Source: Royal Society of Chemistry journal article supplement (doi:10.1039/c6ra01269h), 2016-01-01
Supplement: c6ra01269h1.pdf [file c6ra01269h1.pdf]

# **Highly sensitive and selective “naked eye” sensing of Cu (II) by a novel amido-imine based receptor: a spectrophotometric and DFT study with practical application**

Arghyadeep Bhattacharyya, Soumen Ghosh, Nikhil Guchhait,

Department of Chemistry, University of Calcutta, 92, A.P.C Road, Kolkata-700009, India

## **Table of contents:**

|                                             |    |
|---------------------------------------------|----|
| 1. Characterization of compound 1           | S2 |
| 2. UV-Vis spectra                           | S3 |
| 3. Limit of detection                       | S4 |
| 4. IR spectrum of complex                   | S5 |
| 5. Table for optimized structure parameters | S6 |

## 1. Characterization of compound 1:

a) FTIR spectrum:

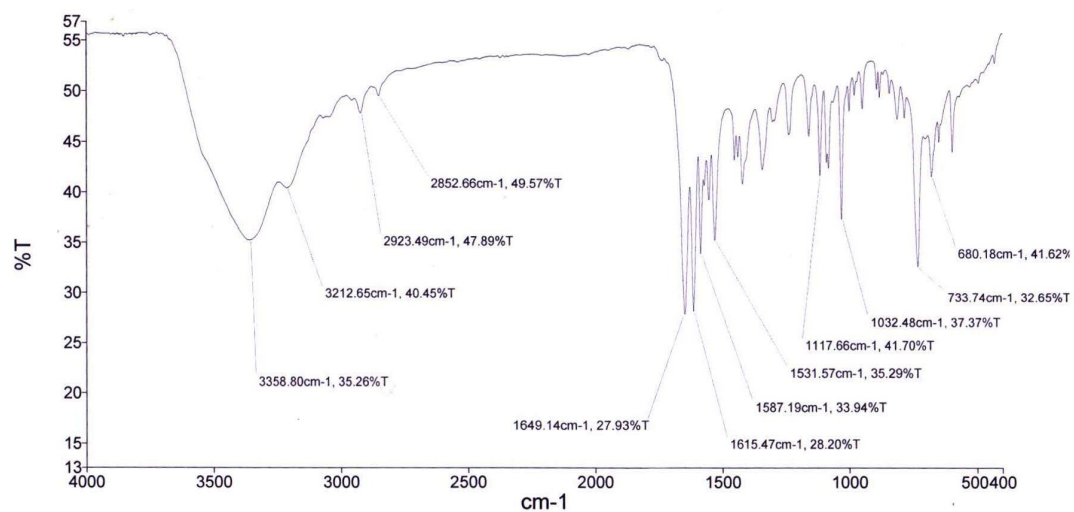

Fig S1: FTIR spectrum of 1

b) <sup>1</sup>H-NMR spectrum:

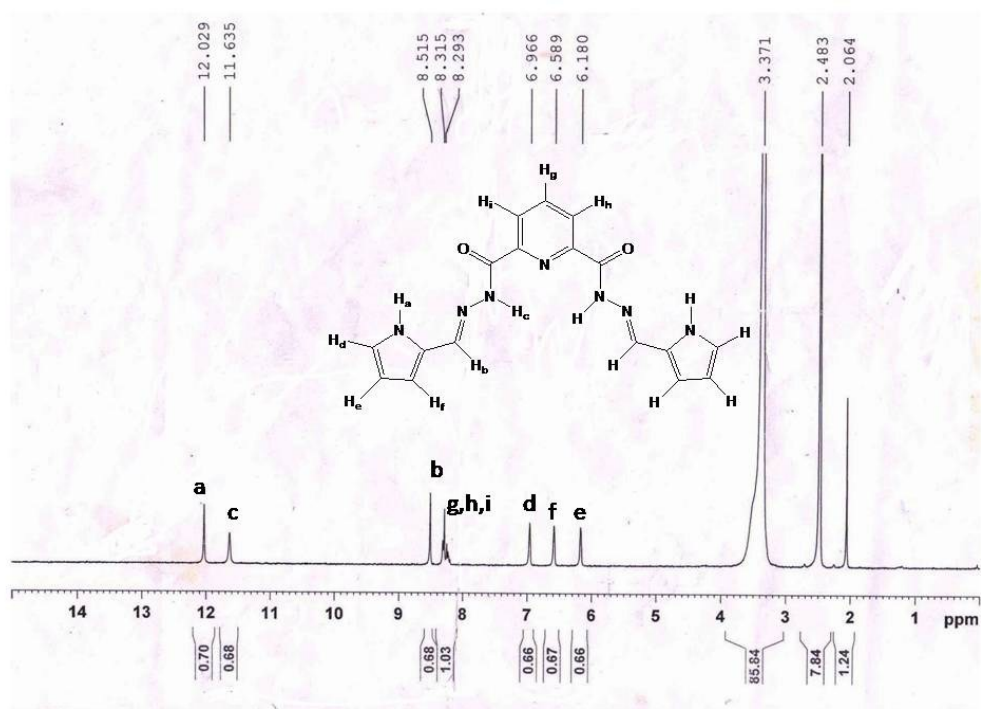

Fig S2: <sup>1</sup>H NMR of compound 1

c)  $^{13}\text{C}$  NMR:

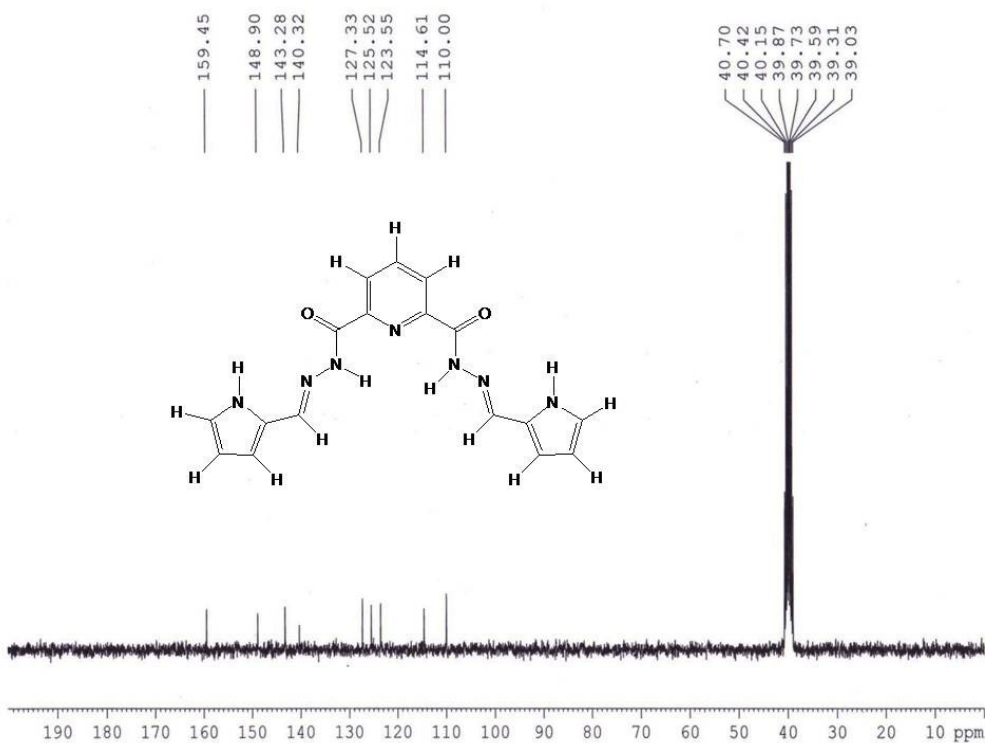

Fig S3:  $^{13}\text{C}$  NMR of compound 1

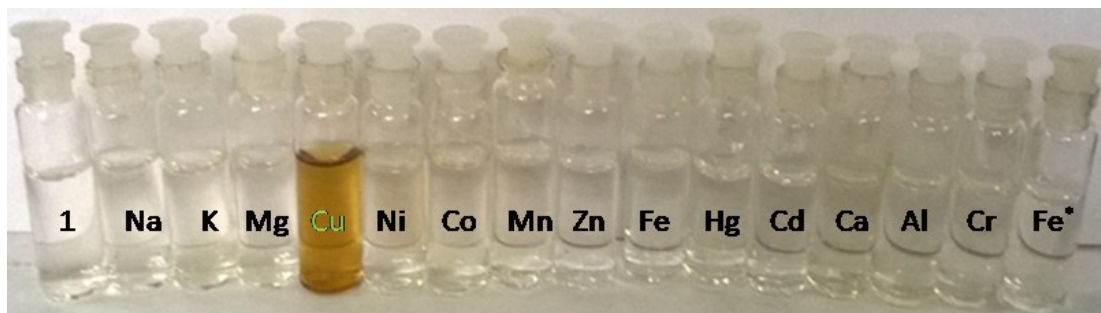

Fig S4: Change in color of receptor 1 (far left) upon addition of  $10\ \mu\text{M}$  aqueous solution of various metals (Fe\* denotes Fe (III)).

## 2. UV-VIS Spectrum:

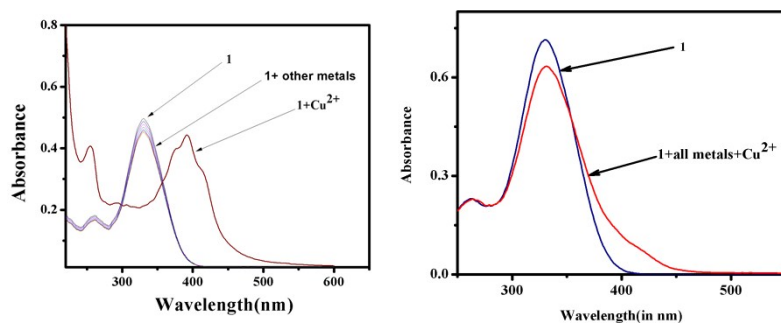

Fig S5a (left): Response of **1** to Cu<sup>2+</sup> over other metals (Ni<sup>2+</sup>, Co<sup>2+</sup>, Mn<sup>2+</sup>, Zn<sup>2+</sup>, Fe<sup>2+</sup>, Hg<sup>2+</sup>, Cd<sup>2+</sup> and Mg<sup>2+</sup>). Fig S5b (right): Response of **1** to Cu<sup>2+</sup> in a mixture of metals (Ni<sup>2+</sup>, Co<sup>2+</sup>, Mn<sup>2+</sup>, Zn<sup>2+</sup>, Fe<sup>2+</sup>, Hg<sup>2+</sup>, Cd<sup>2+</sup> and Mg<sup>2+</sup>) (2 equiv.).

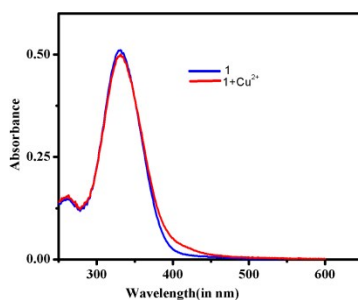

Fig S6: Response of **1** towards 2  $\mu$ L of 10  $\mu$ M aqueous solution of Cu<sup>2+</sup>

### 3. Limit of detection (LOD):

Table of concentration and absorbance values:

Table-S1:

| $[\text{Cu}^{2+}] (4.0 \times 10^{-8} \text{ (M)})$ | Absorbance at 392 nm |
|-----------------------------------------------------|----------------------|
| 2                                                   | 0.093                |
| 4                                                   | 0.135                |
| 6                                                   | 0.185                |
| 8                                                   | 0.245                |
| 10                                                  | 0.285                |
| 12                                                  | 0.337                |
| 14                                                  | 0.389                |
| 16                                                  | 0.434                |
| 18                                                  | 0.464                |
| 20                                                  | 0.496                |
| 22                                                  | 0.521                |

We have,

Standard deviation (S.D) of the blank solution =  $5.471 \times 10^{-4}$

Slope of the calibration curve =  $4.355 \times 10^5 \text{ M}^{-1}$

Thus,  $\text{LOD} = (3 \times \text{S.D}) / \text{Slope} = 3.989 \times 10^{-9} \text{ M} \approx 4.0 \times 10^{-9} \text{ M}$

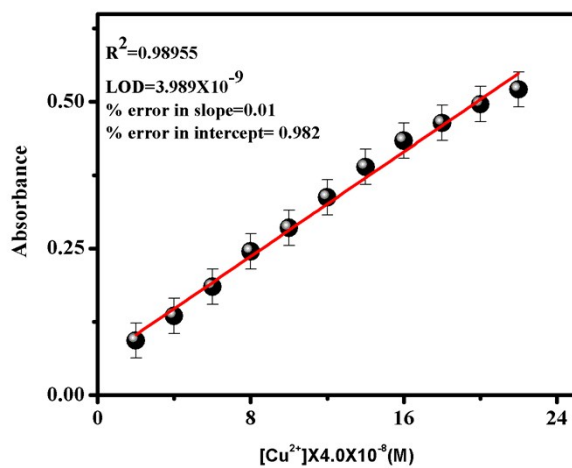

Fig S7: Plot of Absorbance vs. concentration of Cu (II) for calculating LOD

#### 4. IR spectrum of Complex:

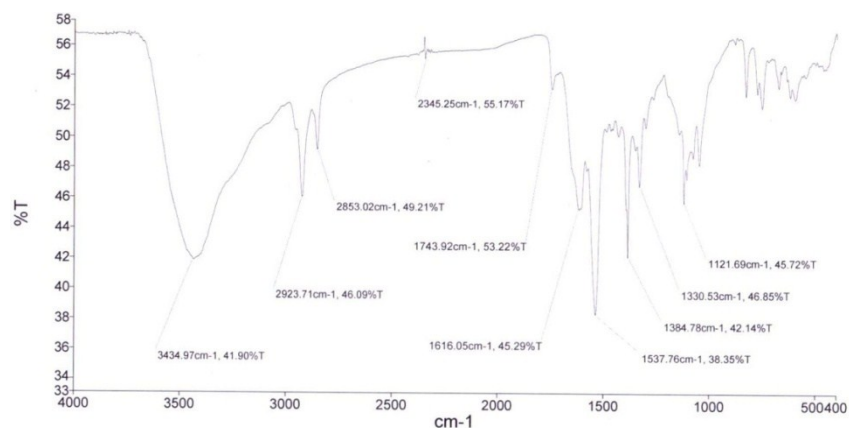

Fig S8: IR spectrum of complex of 1 with Cu<sup>2+</sup>

#### 5. Table for optimized structure parameters:

Following are tabulated the bond lengths (in Å) of the functional groups of 1 as well as its complex for showing the effect of complexation on bond length as obtained from DFT (B3LYP/6-311++g\*\*) optimized structures of 1 and its Cu(II) complex.

Table-S2:

| Species                  | C=O(in Å) | C-N(in Å) | N-H(in Å)<br>(amide) | N-N(in Å) | C=N (in Å)<br>(imine) | N-H(in Å)<br>(pyrrole) |
|--------------------------|-----------|-----------|----------------------|-----------|-----------------------|------------------------|
| <b>1</b>                 | 1.21451   | 1.37049   | 1.01614              | 1.35739   | 1.28503               | 1.00865                |
| <b>1+Cu<sup>2+</sup></b> | 1.25407   | 1.36583   | ---                  | 1.36429   | 1.31169               | ---                    |
